# Supplementary material
Source: ML conference proceedings conference paper supplement (https://proceedings.neurips.cc/paper_files/paper/2010/hash/0e9fa1f3e9e66792401a6972d477dcc3-Abstract.html)
Supplement: Supplementary file [file 0e9fa1f3e9e66792401a6972d477dcc3-Supplemental.zip]

# Supplementary material to the paper Convex Multiple-Instance Learning by Estimating Likelihood Ratio

October 5, 2010

## 1 Proof of Theorem 1

**Lemma 1** *If  $2x$  assumes a beta distribution with parameter  $(1, \beta)$ , the expectation of  $x$ ,  $x^2$ ,  $x^3$ ,  $x^4$  is*

$$\begin{aligned}\mathbb{E}(x) &= \frac{1}{2} \frac{1}{\beta + 1} \\ \mathbb{E}(x^2) &= \frac{1}{2} \frac{1}{(\beta + 2)(\beta + 1)} \\ \mathbb{E}(x^3) &= \frac{3}{4} \frac{1}{(\beta + 1)(\beta + 2)(\beta + 3)} \\ \mathbb{E}(x^4) &= \frac{3}{2} \frac{1}{(\beta + 1)(\beta + 2)(\beta + 3)(\beta + 4)}\end{aligned}$$

**Proof:** It is known that the expectation of the beta distribution  $B(1, \beta)$  is  $\mathbb{E}(x) = \frac{1}{\beta+1}$ , therefore the first equation is immediate.

For  $k > 1$ , the expectations  $\mathbb{E}(x^k)$  of a beta distribution can be computed as:

$$\begin{aligned}& \int_0^1 \frac{1}{B(\alpha, \beta)} x^k x^{\alpha-1} (1-x)^{\beta-1} dx \\&= \int_0^1 \frac{\Gamma(\alpha + \beta)}{\Gamma(\alpha)\Gamma(\beta)} x^k x^{\alpha-1} (1-x)^{\beta-1} dx \\&= \frac{\Gamma(\alpha + \beta)\Gamma(\alpha + k - 1)}{\Gamma(\alpha + k - 1 + \beta)\Gamma(\alpha)} \int_0^1 \frac{\Gamma(\alpha + k - 1 + \beta)}{\Gamma(\alpha + k - 1)\Gamma(\beta)} x^k x^{\alpha-1} (1-x)^{\beta-1} dx \\&= \frac{\Gamma(\alpha + \beta)\Gamma(\alpha + k - 1)}{\Gamma(\alpha + k - 1 + \beta)\Gamma(\alpha)} \int_0^1 x \frac{1}{B(\alpha + k - 1, \beta)} x^{\alpha+k-2} (1-x)^{\beta-1} dx \\&= \frac{\prod_{j=0}^{k-2} (\alpha + j)}{\prod_{j=0}^{k-2} (\alpha + \beta + j)} \frac{\alpha + k - 1}{\alpha + k - 1 + \beta} (k \geq 2)\end{aligned} \tag{1}$$

The last step use the formulae  $B(x+y) = \frac{\Gamma(x)\Gamma(y)}{\Gamma(x+y)}$  and  $\Gamma(x+1) = x\Gamma(x)$ , as well as the expectation of the beta distribution  $\mathbb{E}(x) = \frac{\alpha}{\alpha+\beta}$ .

If  $2x$  instead of  $x$  assumes the beta distribution, then

$$\begin{aligned}\mathbb{E}(x^k) &= \frac{1}{2^k} \mathbb{E}((2x)^k) \\ &= \frac{1}{2^k} \frac{\prod_{j=0}^{k-2} (\alpha + j)}{\prod_{j=0}^{k-2} (\alpha + \beta + j)} \frac{\alpha + k - 1}{\alpha + k + \beta - 1}.\end{aligned}\quad (2)$$

Substitute  $\alpha = 1, k = 2, 3, 4$  we obtain the Lemma.  $\square$

**Proof of Theorem 1:**

**Proof:** Define  $\eta(x_i) = \Pr(y = 1|x_i, \Pr(y = -1|x_i) > \Pr(y = 1|x_i))$ . The most adversarial scenario is  $\Pr(1 - 2\eta(x_i) \leq 2\epsilon) = c\epsilon^\beta$ , because this maximizes uniformly the chance that the class-conditional probability is close to  $1/2$ . This means  $2\eta(x_i)$  assumes a beta distribution  $B(1, \beta)$ . It could be proved that the likelihood ratio satisfies

$$\frac{9}{4}\eta^2 + \frac{3}{4}\eta \leq \frac{\eta}{1-\eta} \leq 2\eta^2 + \eta$$

From Lemma 1, we know that  $E(\eta^2) = \frac{1}{2} \frac{1}{(\beta+2)(\beta+1)}, E(\eta) = \frac{1}{2} \frac{1}{\beta+1}$ , therefore we have

$$\frac{3}{8} \frac{\beta+5}{(\beta+1)(\beta+2)} \leq \mathbb{E}\left(\frac{\eta}{1-\eta}\right) \leq \frac{\beta+4}{2(\beta+1)(\beta+2)}$$

Furthermore, a bound on the variance can be computed as

$$\begin{aligned}V\left(\frac{\eta}{1-\eta}\right) &= \mathbb{E}\left[\left(\frac{\eta}{1-\eta}\right)^2\right] - \mathbb{E}\left[\left(\frac{\eta}{1-\eta}\right)\right]^2 \\ &\leq 4E(\eta^4) + 4E(\eta^3) + E(\eta^2) - \frac{9}{64} \frac{(\beta+5)^2}{(\beta+1)^2(\beta+2)^2} \\ &\leq \left(\frac{1}{2} + \frac{5}{8(\beta+1)} + \frac{51\beta-83}{8(\beta+1)(\beta+3)(\beta+4)}\right) \frac{1}{(\beta+1)(\beta+2)}\end{aligned}$$

in which  $E(\eta^4) = \frac{3}{2} \frac{1}{(\beta+1)(\beta+2)(\beta+3)(\beta+4)}, E(\eta^3) = \frac{3}{4} \frac{1}{(\beta+1)(\beta+2)(\beta+3)}$ . The last step involves some quite complicated arithmetics and simplification.

A simpler bound can be expressed as:

$$V\left(\frac{\eta}{1-\eta}\right) \leq \frac{(4\beta+1)}{2(\beta+1)^2(2\beta+3)},$$

which is an upper bound of the above bound.

By Bennett's inequality [1],

$$\frac{1}{n} \sum_{i=1}^n Z_i - E(Z) \leq \sqrt{\frac{2V(Z) \log 1/\delta}{n}} + \frac{\log 1/\delta}{3n}$$

therefore with probability  $1 - \delta$ ,

$$\sum_{i=1}^n Z_i \leq nE(Z) + \sqrt{2nV(Z) \log 1/\delta} + \frac{\log 1/\delta}{3}.$$

Take  $Z = \frac{\eta}{1-\eta}$  and plug in the mean and variance bounds computed previously, we obtain the theorem.  $\square$

## 2 Proof of Theorem 2

(a) It is straightforward to show that

$$\begin{aligned} R(f) - R^* &= R(f) - R(\eta - 1/2) \\ &= E(\mathbf{1}[f(X) > 1, \eta(X) < 1/2](1 - 2\eta(X)) \\ &\quad + E(\mathbf{1}[f(X) < 1, \eta(X) > 1/2](2\eta(X) - 1)) \\ &= (R_-(f) - R_-^*) + R_+(f) - R_+^* \end{aligned}$$

We apply Jensen's inequality to both summands and obtain

$$\begin{aligned} &\psi(-\mathbf{1}[\eta(X) < 1/2](R(f) - R^*)) + \psi(\mathbf{1}[\eta(X) \geq 1/2](R(f) - R^*)) \\ &\leq E(\psi(-\mathbf{1}[\eta(X) < 1/2, f(X) > 1](1 - 2\eta(X))) \\ &\quad + \psi(\mathbf{1}[\eta(X) \geq 1/2, f(X) < 1](2\eta(X) - 1))) \\ &= E(\mathbf{1}[\text{sign}(f(X) - 1) \neq \text{sign}(\eta(X) - 1/2)]\psi((2\eta(X) - 1))) \\ &\leq E(\mathbf{1}[\text{sign}(f(X) - 1) \neq \text{sign}(\eta(X) - 1/2)]\tilde{\psi}((2\eta(X) - 1))) \\ &= E(\mathbf{1}[\text{sign}(f(X) - 1) \neq \text{sign}(\eta(X) - 1/2)](H^-(\eta(X)) - H(\eta(X)))) \\ &= E\left(\mathbf{1}[\text{sign}(f(X) - 1) \neq \text{sign}(\eta(X) - 1/2)]\left(\inf_{\alpha, (\alpha-1)(2\eta(X)-1) \leq 0} C(\alpha, \eta(X)) - H(\eta(X))\right)\right) \\ &\leq E(C(\alpha, \eta(X)) - H(\eta(X))) \\ &= R_C(f) - R_C^* \end{aligned}$$

(b) First note that since  $\psi(0) = 0$  and  $\psi$  is continuous,  $\theta_i \rightarrow 0$  implies  $\psi(\theta_i) \rightarrow 0$ . Thus we can replace condition (2) by

(2') For any sequence  $(\theta_i)$  in  $[-1, 1]$ ,

$$\psi(\theta_i) \rightarrow 0 \text{ implies } \theta_i \rightarrow 0$$

To see that (1) implies (2'), let  $C$  be classification-calibrated, and let  $(\theta_i)$  be a sequence that does not converge to 0. Define  $c = \limsup \theta_i > 0$ , and pass to a subsequence with  $\lim \theta_i = c$ . Then by continuity  $\lim \psi(\theta_i) = \psi(c)$ , and  $\psi(c) > 0$  by classification-calibration. Thus for the original sequence  $(\theta_i)$ , we see  $\limsup \psi(\theta_i) > 0$ , so we cannot have  $\psi(\theta_i) \rightarrow 0$ .

To see that (2') implies (3), suppose that  $R_C(f_i) \rightarrow R_C^*$ . By part (a) of the theorem  $\psi^-(R_-(f_i) - R_-^*) + \psi(R_+(f_i) - R_+^*) \rightarrow 0$ , since both  $\psi^-$  and  $\psi$  are convex and positive, (2') implies  $R(f_i) \rightarrow R^*$ .

Finally, to see (3) implies (1), suppose  $C$  is not classification-calibrated. By definition, we can choose  $\eta \neq 1/2$  and a sequence  $\alpha_1, \alpha_2, \dots$  such that  $\text{sign}(\alpha_i(\eta - 1/2)) = -1$  but  $c_\eta(\alpha_i) \rightarrow H(\eta)$ . Fix  $x$  and choose the probability distribution  $P$  so that  $P_X\{x\} = 1$  and  $P(Y = 1|X = x) = \eta$ . Define a sequence of functions  $f_i$  for which  $f_i(x) = \alpha_i$ . Then  $\lim R(f_i) > R^*$ , and this is true for any infinite subsequence. But  $C_\eta(\alpha_i) \rightarrow H(\eta)$  implies  $R_C(f_i) \rightarrow R_C^*$ . The contradiction proves the final part of the theorem.  $\square$

### 3 Equivalent Constant Transforms

**Proposition 1** *For loss functions that satisfy a scaling equality  $L(k_1\hat{y}, k_1y) = k_2L(\hat{y}, y)$ , solving (4) with  $C = C_0$  and  $D_i$  for each bag is equivalent with solving (3) with  $C = \frac{k_1^2}{k_2}C_0$  and  $k_1D_i$ .*

**Proof:** A variable substitution of  $z = k_1y$  and  $v = k_1w$  in (3) would obtain the conclusion.  $\square$

The support vector regression (SVR) we use satisfies  $L(k_1\hat{y}, k_1y; \epsilon) = k_1L(\hat{y}, y; \frac{\epsilon}{k_1})$ . In this case, the uniform scaling on all the  $D_i$ s is equivalent to subsequent changes in both  $C$  and  $\epsilon$ .

### 4 Projection to the Bag Constraint

We use the following procedure to project  $y^+$ : Denote the sum of scores in a bag as  $s_i = \sum_{x_j^+ \in B_i} y_j^+$ . For each bag  $B_i$ , we check if  $s_i < D_i$ , if not, we simply set all the negative  $y_j^+$  to 0. If  $s_i < D_i$ , we add  $\frac{D_i - s_i}{|B_i|}$  to each  $y_j^+$ . This makes  $s_i = D_i$ . Then we set all the negative  $y_j^+$  to 0. If this makes  $s_i > D_i$ , we subtract equal amount on all the positive  $y_j^+$ , to make  $s_i = D_i$ . If this created additional negative  $y_j^+$ , the alternating projection process goes on until both conditions:  $s_i = D_i$  and  $y^+ \geq 0$  are fulfilled.

### 5 Derivation of the SVM dual problem

First rewrite the optimization in the canonical form:

$$\begin{aligned} \min_{w, b, y^+} \quad & \frac{1}{2}\|w\|^2 + C(\sum_{i=1}^{n_+ + n_-} (\xi_i + \hat{\xi}_i)) \\ \text{s.t.} \quad & (\langle w, \phi(x_i) \rangle + b) - y_i \leq \epsilon + \xi_i, \text{ for each } x_i^+, x_i^- \\ & y_i - (\langle w, \phi(x_i) \rangle + b) \leq \epsilon + \hat{\xi}_i, \text{ for each } x_i^+, x_i^- \\ & \sum_{x_j^+ \in B_i} y_j^+ \geq D_i|B_i| \\ & y_j^+ \geq 0 \end{aligned}$$

where  $y_i = 0$  for  $x_i^-$  and  $K(x, y) = \langle \phi(x), \phi(y) \rangle$ .

Setting  $\alpha_i^-, \alpha_i^+$  as the Lagrange multipliers of the first and second set of constraints, and  $\eta_j$  the Lagrange multipliers of the bag constraints, we obtain the following KKT condition:

$$\begin{aligned} w &= \sum_i (\alpha_i^+ - \alpha_i^-) \phi(x_i) \\ 0 &\leq \alpha_i^+, \alpha_i^- \leq C \\ \eta_j &\leq \alpha_i^+ - \alpha_i^- \\ \sum_i (\alpha_i^+ - \alpha_i^-) &= 0 \\ \alpha_i^+, \alpha_i^-, \eta_j &\geq 0 \end{aligned}$$

From the KKT conditions one could see that to make the equality constraint  $\sum_{x_j^+ \in B_i} y_j^+ = D_i |B_i|$  hold, we need  $\eta_j > 0$ , essentially, each  $\alpha_i^+$  in the bag must be positive. This means that  $y_i - (\langle w, \phi(x_i) \rangle + b) \geq \epsilon$  for all the items in the bag. Thus, to make the equality hold, all items in the positive bag need to be predicted smaller than their real value  $y_i$ . Another issue is, since  $\eta \geq 0$  must hold,  $\alpha_i^+ \geq \alpha_i^-$ , since only one of  $\alpha_i^+$  and  $\alpha_i^-$  is nonzero, this means  $\alpha_i^- = 0$  for instances in positive bags. Therefore, the situation that  $\alpha_i^+ = 0, \alpha_i^- > 0$  could never exist. Back to the original optimization problem, this means  $(\langle w, \phi(x_i) \rangle + b) - y_i \leq \epsilon + \xi_i$  never holds in equality. Therefore,  $(\langle w, \phi(x_i) \rangle + b) \leq y_i + \epsilon$ .

The dual problem is very similar with the original SVM, with only minor differences introduced from  $\eta$ :

$$\begin{aligned} \min_{\alpha^+, \alpha^-, \eta} \quad & \frac{1}{2} (\alpha^+ - \alpha^-)^T K (\alpha^+ - \alpha^-) \\ & + \epsilon \sum_{i=1}^n (\alpha_i^+ + \alpha_i^-) - \sum_{i=1}^k D_i |B_i| \eta_i \\ \text{s.t.} \quad & 0 \leq \alpha_i^+, \alpha_i^- \leq C \\ & \sum_{i=1}^n (\alpha_i^+ - \alpha_i^-) = 0 \\ & \eta_j \leq \alpha_i^+ - \alpha_i^-, x_i \in B_j \\ & \alpha_i^+, \alpha_i^-, \eta_j \geq 0 \end{aligned}$$

From the dual problem, we could see that  $\eta_j$  needs to be made larger to improve the result of the dual. Therefore, the algorithm would always prefer to choose  $\eta_j > 0$ . From our previous analysis this essentially means that the equality constraint  $\sum_{x_j^+ \in B_i} y_j^+ = D_i |B_i|$  is desirable. Thus the algorithm would tend to make more vectors from positive bags as support vectors. And tend to make predictions smaller than the estimated value  $y_i$ .

It could be seen that the best solution of  $\eta_j$  is  $\eta_j = \max(\min_{x_i \in B_j} (\alpha_i^+ - \alpha_i^-), 0)$ , with this in mind, the problem can still be solved using an SMO-type active set approach of selecting two  $\alpha_i$  for one iteration.

The SMO subproblem is thus:

$$\begin{aligned}
\min_{\alpha_i, \alpha_j} \quad & \frac{1}{2} \begin{bmatrix} s_i \alpha_i & s_j \alpha_j \end{bmatrix} \begin{bmatrix} Q_{ii} & Q_{ij} \\ Q_{ij} & Q_{jj} \end{bmatrix} \begin{bmatrix} s_i \alpha_i \\ s_j \alpha_j \end{bmatrix} + \epsilon(\alpha_i + \alpha_j) \\
& - D_{k_1} |B_{k_1}| \eta_{k_1} - D_{k_2} |B_{k_2}| \eta_{k_2} \\
\text{s.t.} \quad & 0 \leq \alpha_i, \alpha_j \leq C \\
& s_i \alpha_i + s_j \alpha_j \text{ doesn't change}
\end{aligned}$$

where  $s_i$  and  $s_j$  are the signs of  $\alpha_i$  and  $\alpha_j$ , respectively.

The SMO working set selection would be the same as in the original SVM, i.e., find the maximal violating pair, except that the gradient now needs to take  $\eta$  into consideration.

## References

- [1] Hoeffding, W.: Probability inequalities for sums of bounded random variables. Journal of the American Statistical Association **58** (1963) 13–30
